# Supplementary material
Source: ML conference proceedings conference paper supplement (https://openreview.net/forum?id=lWaz5a9lcFU)

## SUPPLEMENTARY FILE

**Anonymous authors**

Paper under double-blind review

### 1 RECONSTRUCTED IMAGES

A representative sample of reconstructed images by EEC for MNIST, SVHN and CIFAR-10 datasets after 10 tasks and ImageNet-50 dataset after 5 tasks.

#### 1.1 MNIST

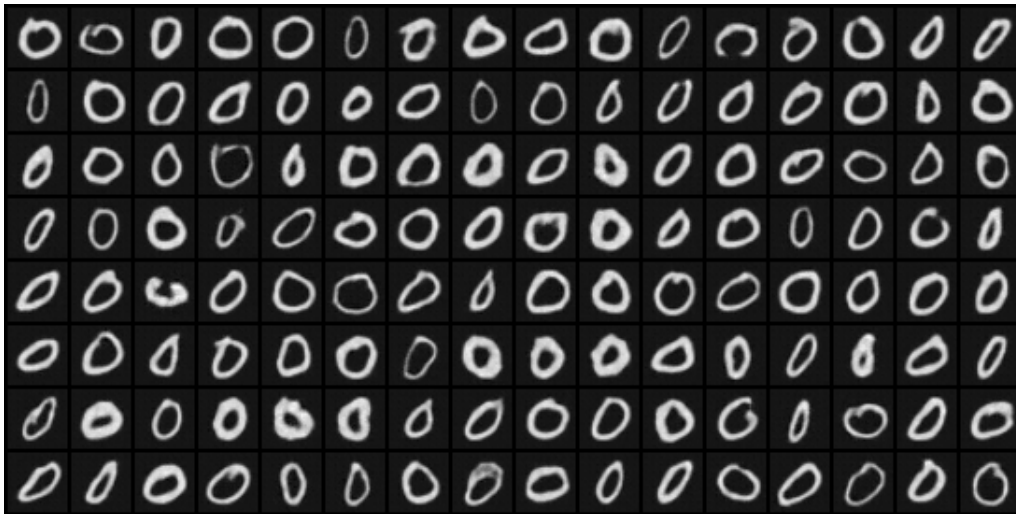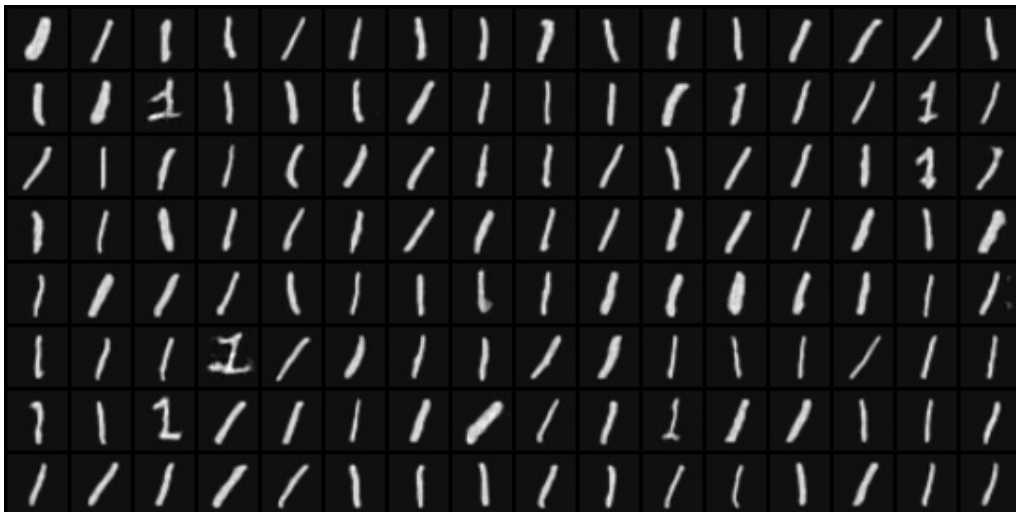

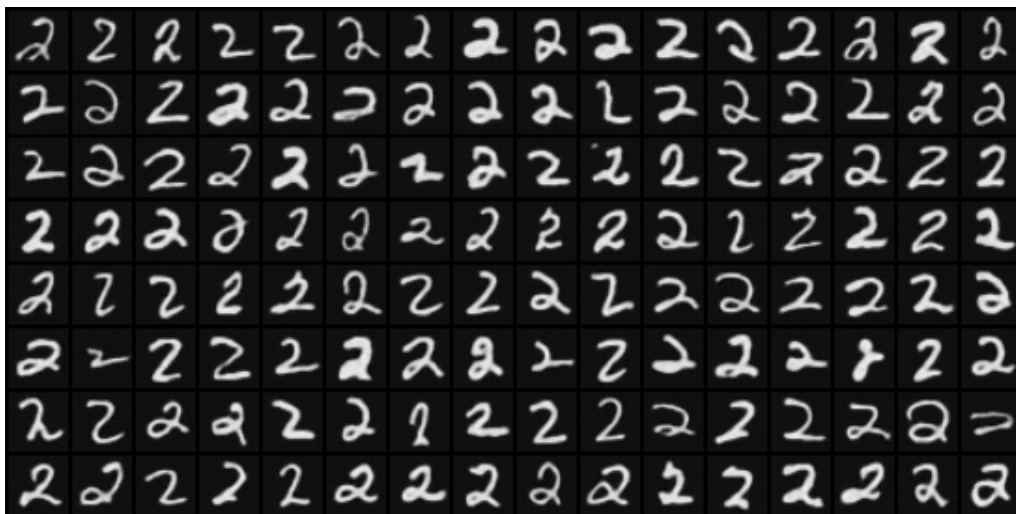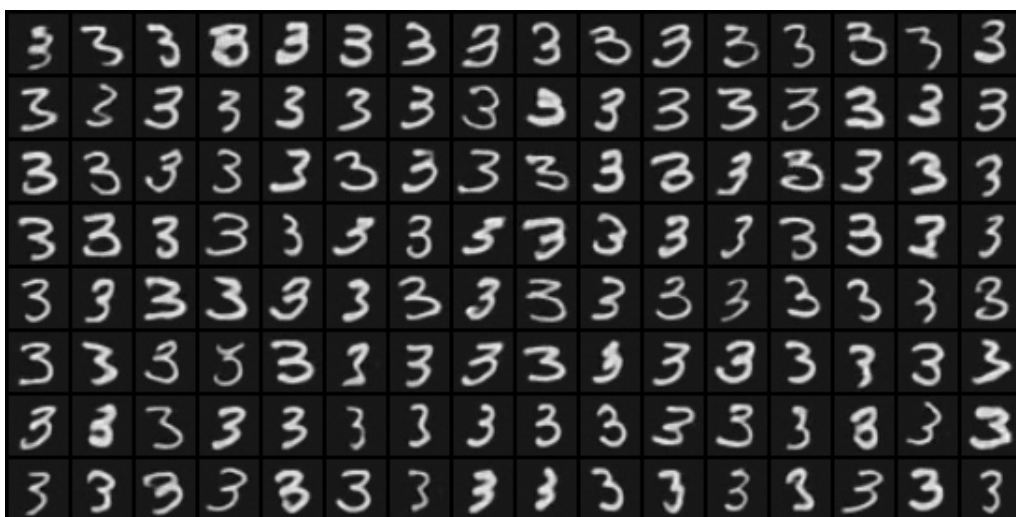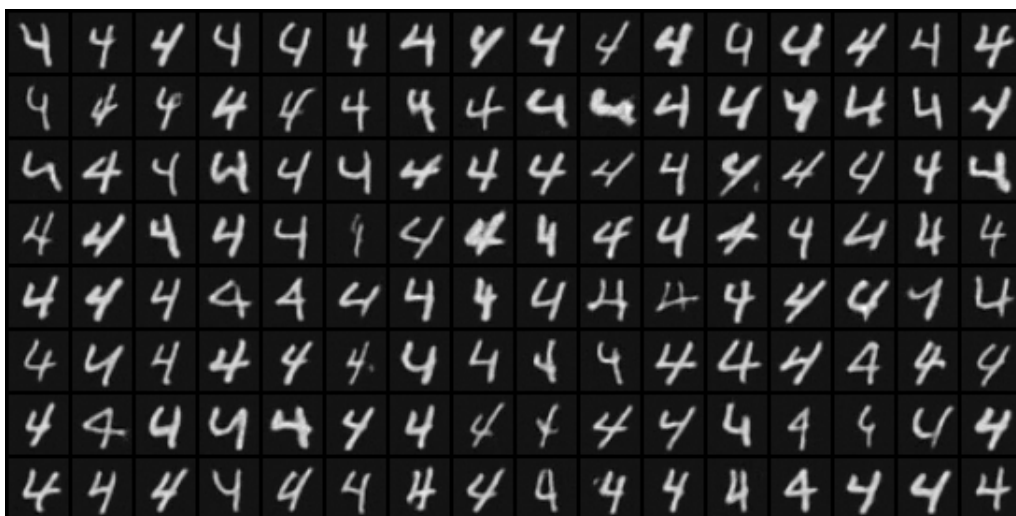

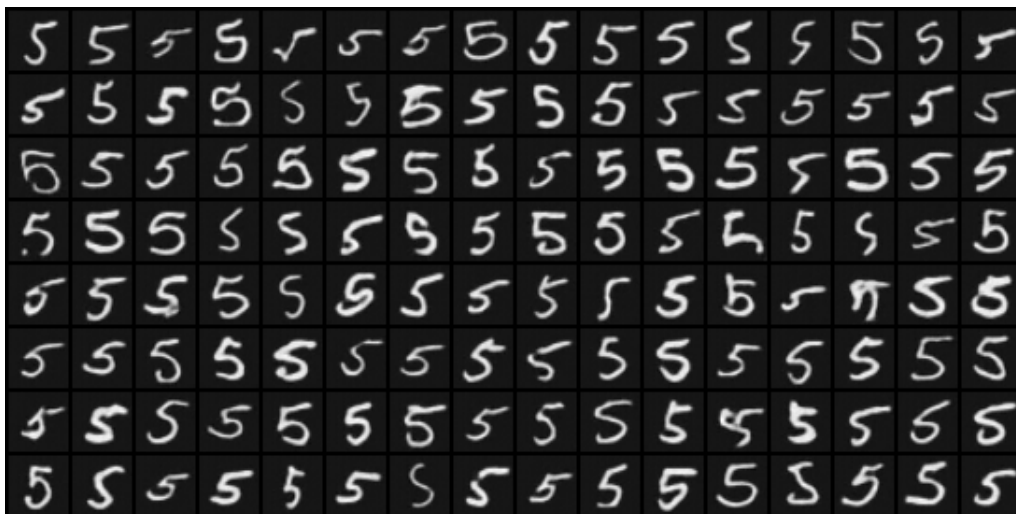

## 1.2 SVHN

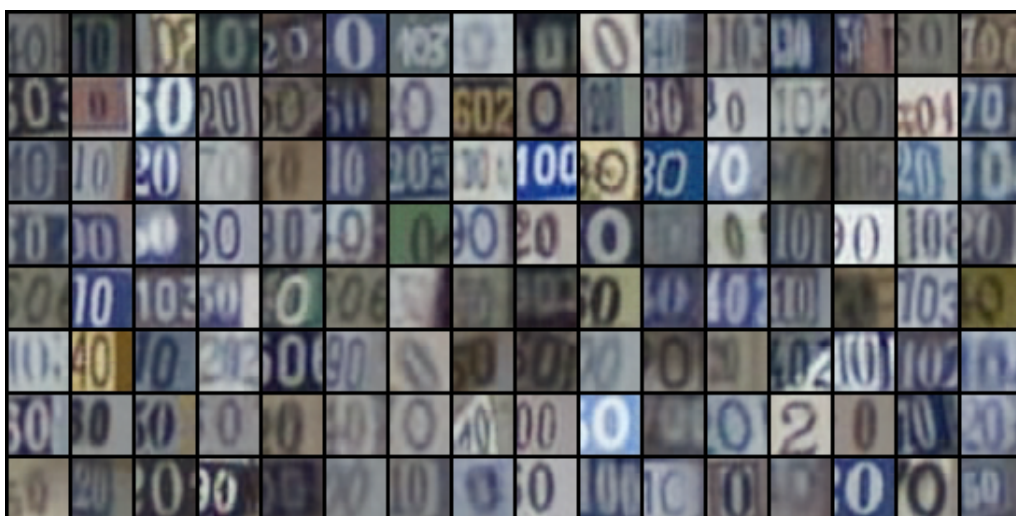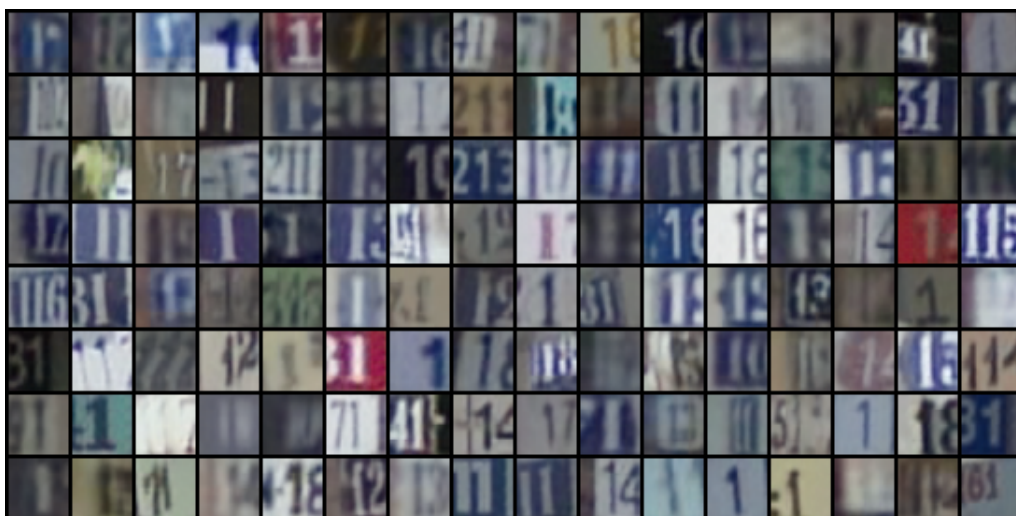

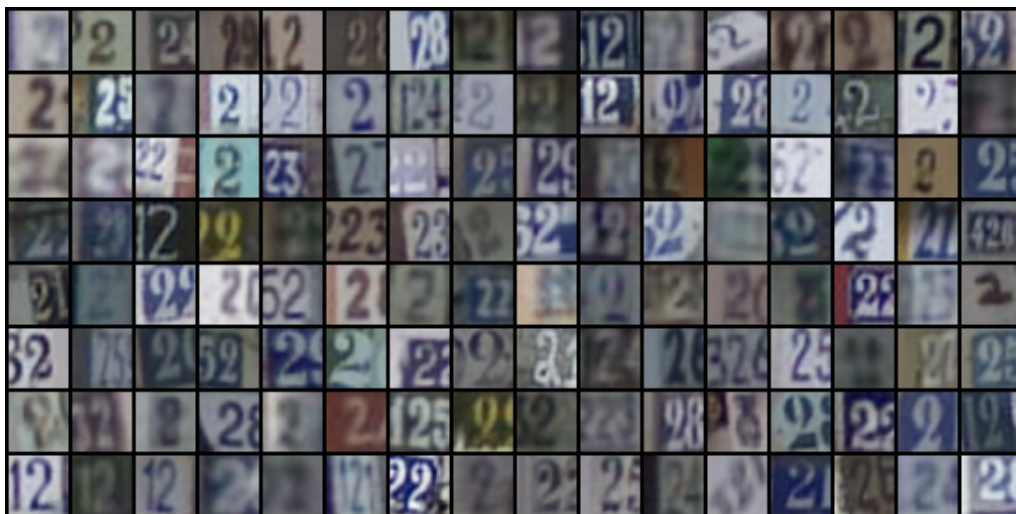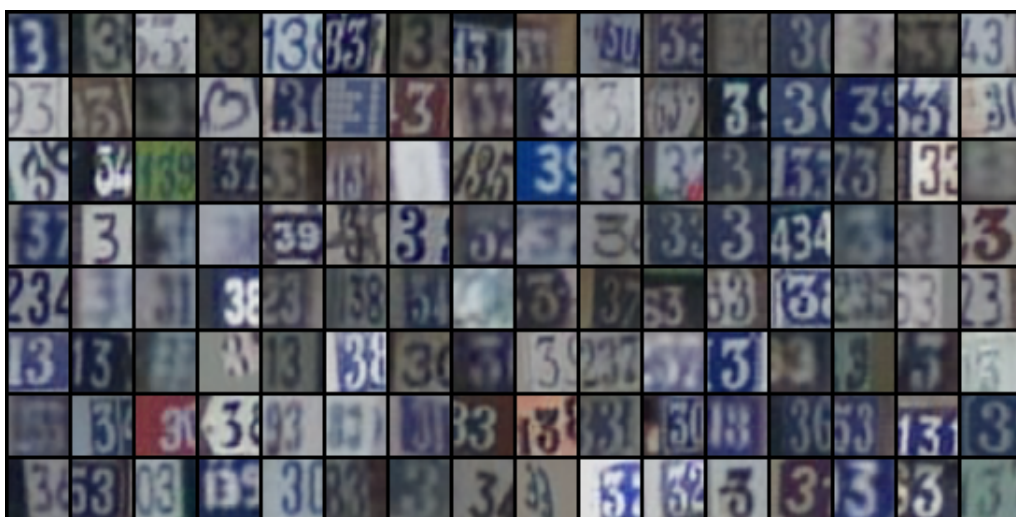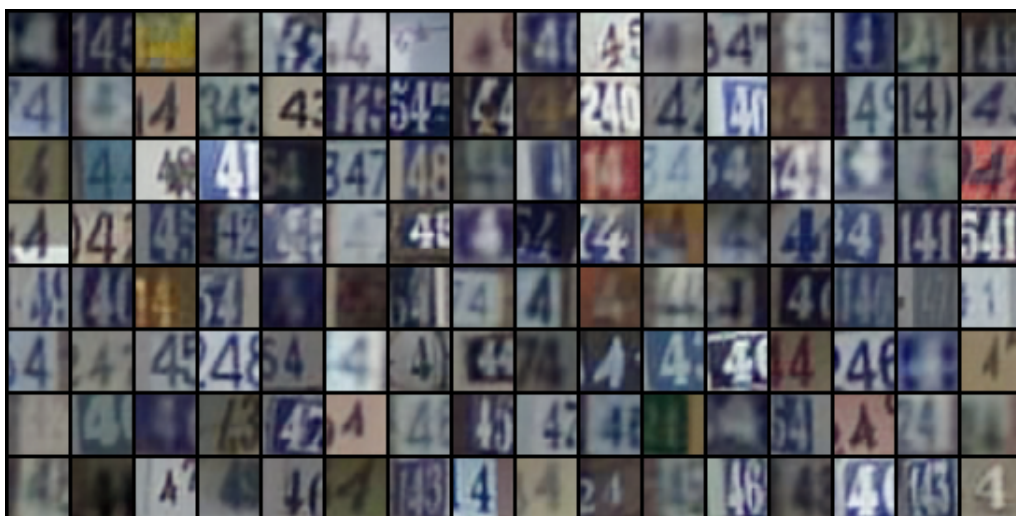



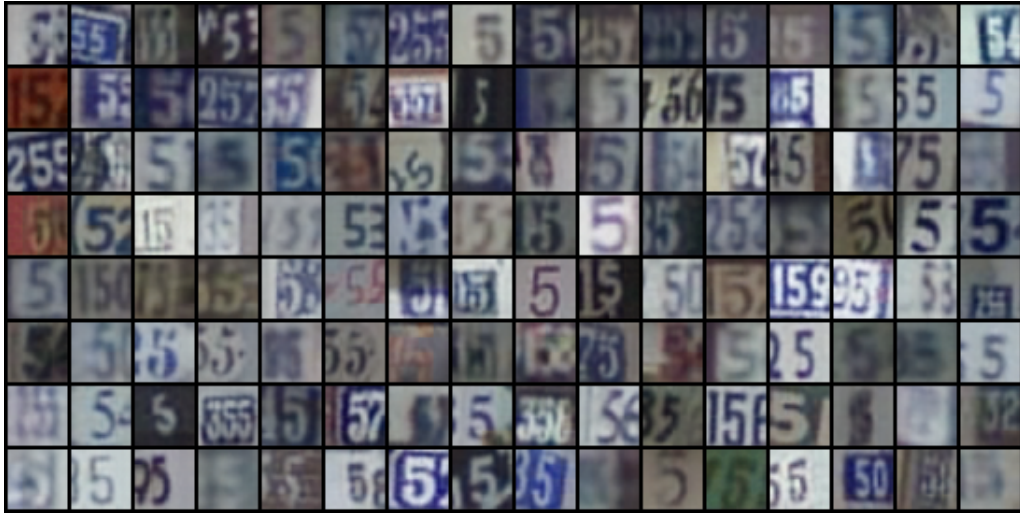

### 1.3 CIFAR-10

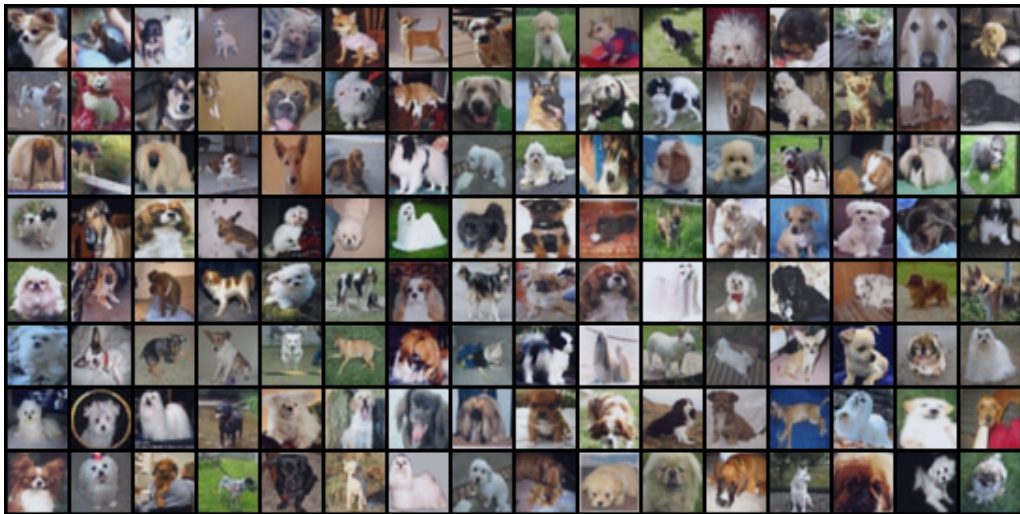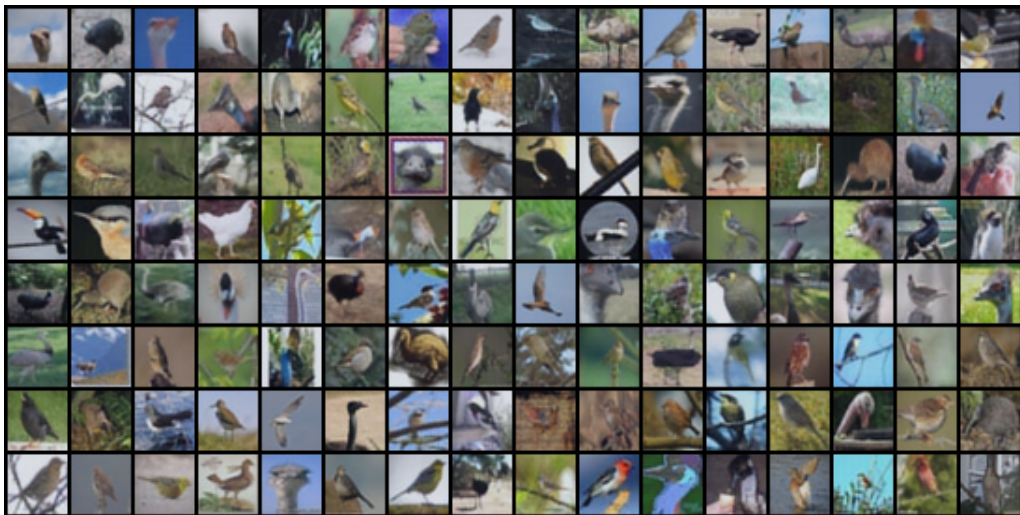

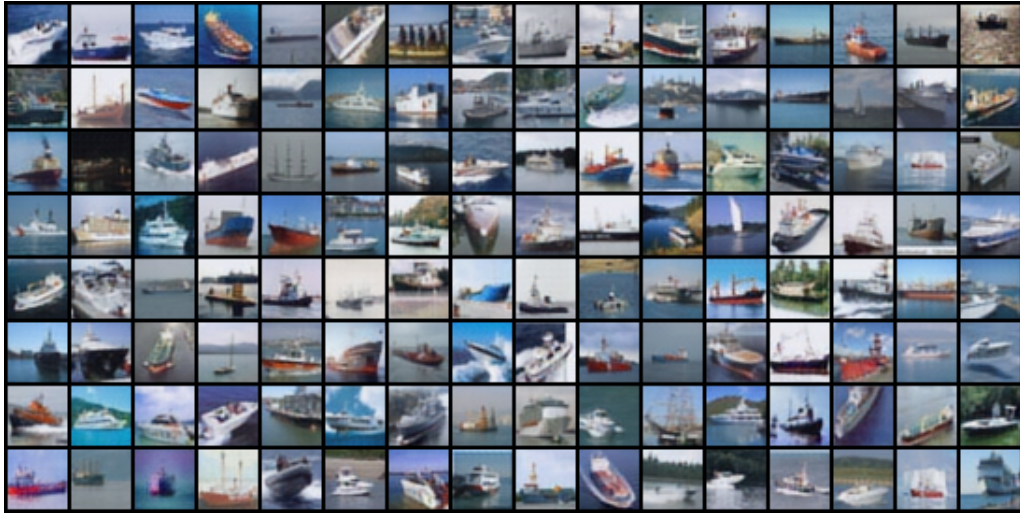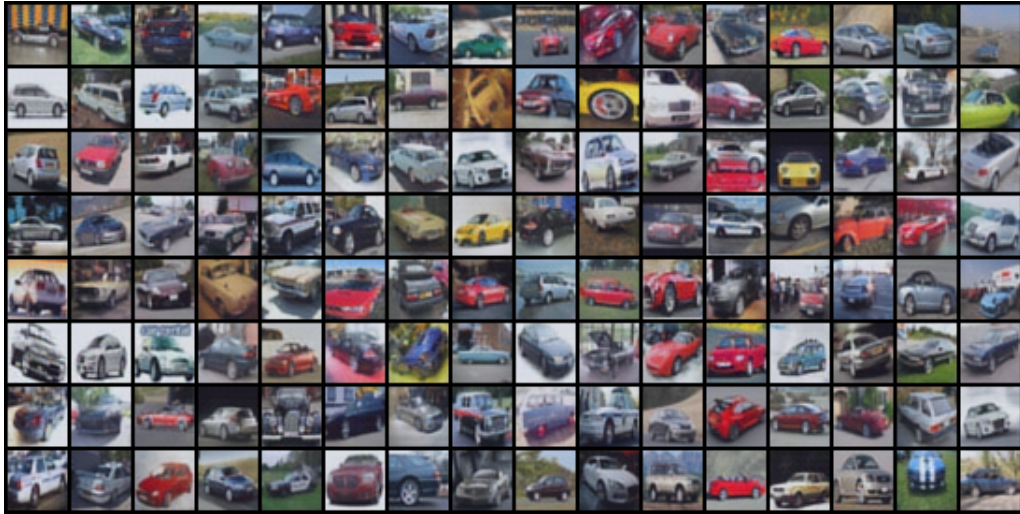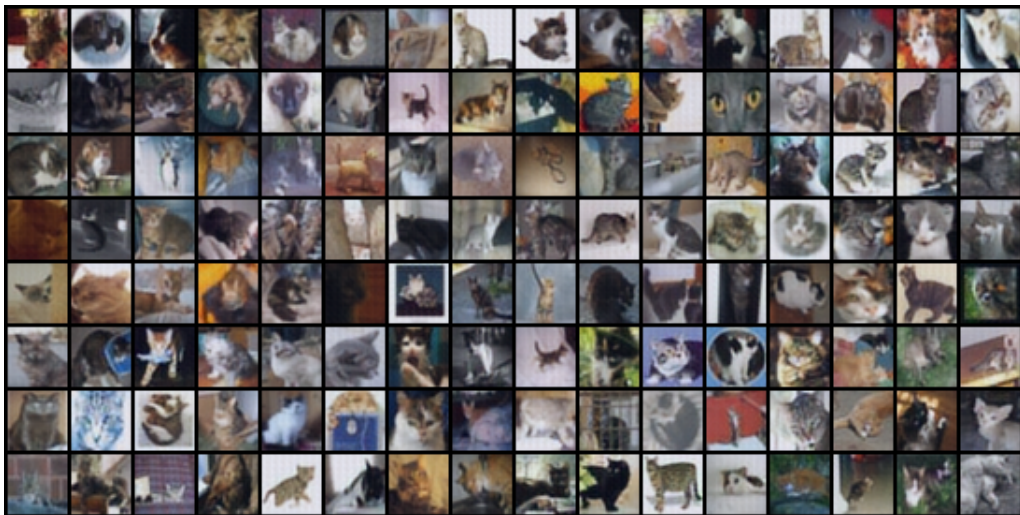



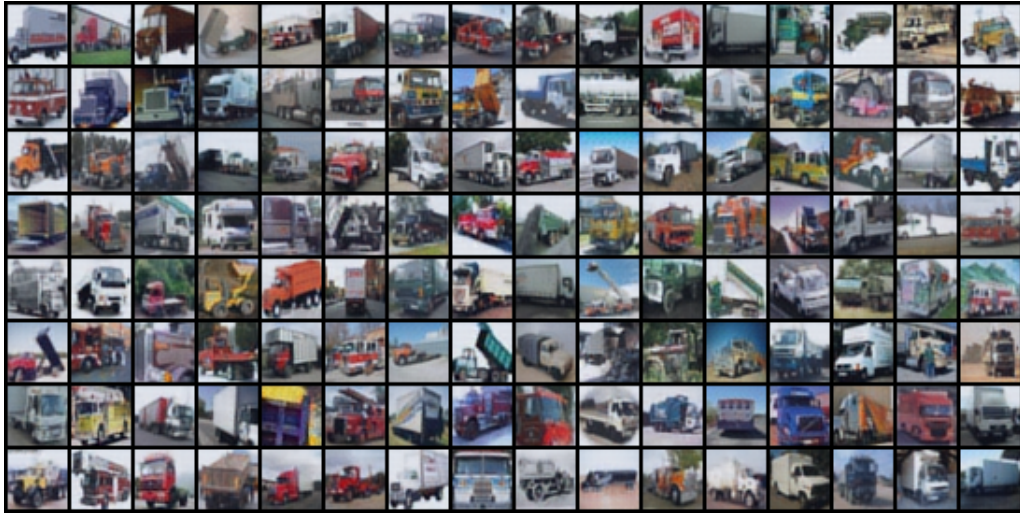

#### 1.4 IMAGENET-50

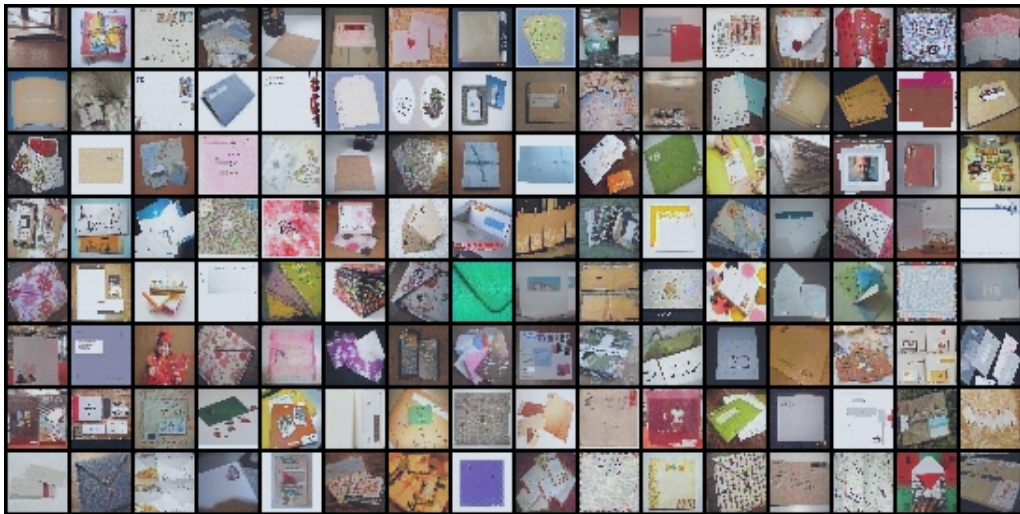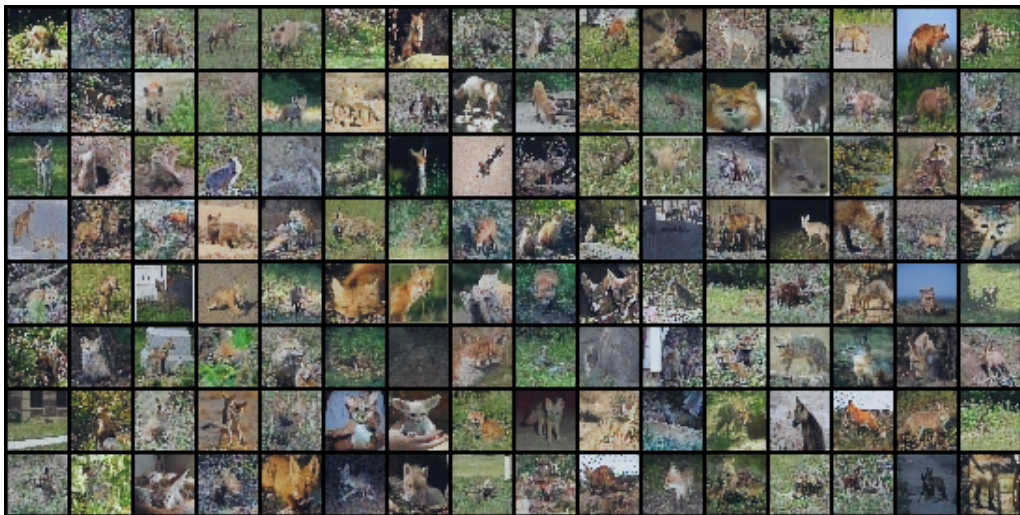







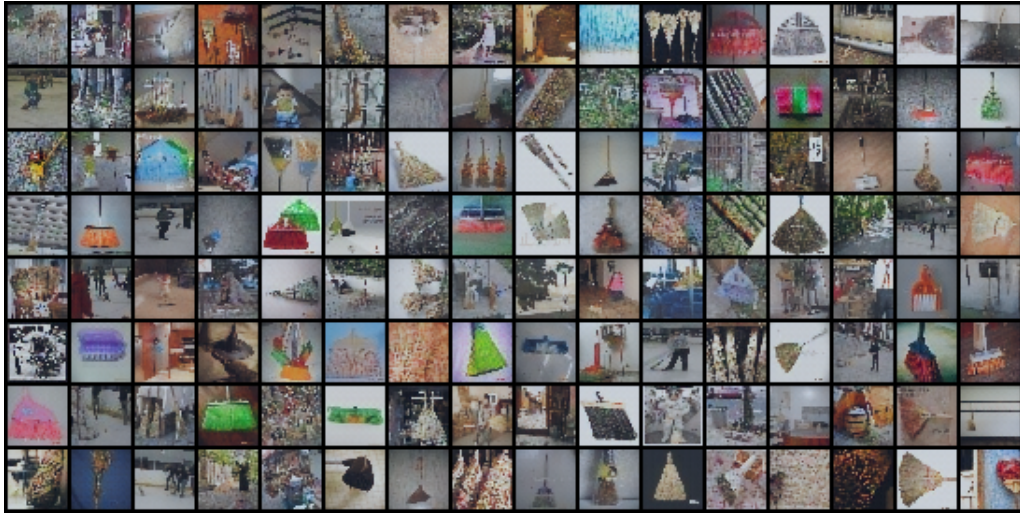

Supplement: supplementary_material [file attachment]
